# Supplementary material for: Human LIGIV is synthetically lethal with the loss of Rad54B-dependent recombination and is required for certain chromosome fusion events induced by telomere dysfunction
Source: PubMed Central journal article supplement — Nucleic Acids Res. 2012 Dec 26;41(3):1734–49. doi: 10.1093/nar/gks1326 (PMC3561972; doi:10.1093/nar/gks1326), 2012-12-26

**Supplementary Figure 1.** G-band karyotyping demonstrates that *LIGIV*-null cells are genetically unstable. Gross chromosomal rearrangements are indicated by red asterisks. The parental (*LIGIV*<sup>+/+</sup>) cell line has 4 very reproducible abnormalities including a duplication on chromosome 10, translocations on chromosomes 16 and 18 and the variable loss of the Y chromosome (panel A). Karyotypes of the heterozygous (*LIGIV*<sup>+/-</sup>) #130-26 cell line were indistinguishable from the parental cell line (panel B). Karyotypes of the null (*LIGIV*<sup>-/-</sup>) #312 cell line contained the parental GCRs as well as additional ones (panel C) and showed frequent chromosome and chromatid breaks (panel D).

**Supplementary Figure 2.** Complementation of *LIGIV*-null cells with HA-tagged and untagged versions of a *LIGIV* human cDNA. Nuclear extracts from the parental cell line (WT), a *LIGIV* heterozygous clone (*LIGIV*<sup>+/-</sup>), the *LIGIV*-null clone (*LIGIV*<sup>-/-</sup>) and two *LIGIV*-null clones stably complemented with either an untagged (#14 and #57) or a HA-tagged (#17 and #52) version of a human *LIGIV* wild-type cDNA were subjected to an immunoblot analysis using either a *LIGIV*-specific antibody (first 5 lanes), an HA-antibody (last 2 lanes) or, as a loading control, an actin antibody (all seven lanes).

**Supplementary Table 1. Summary of GCR frequency in *LIGIV* clones**

| <b>Designation</b> | <b>Genotype</b>            | <b>Metaphases</b> | <b>GCRs</b> | <b>Frequency (%)</b> |
|--------------------|----------------------------|-------------------|-------------|----------------------|
| <b>wtHCT116</b>    | <b>LIGIV<sup>+/+</sup></b> | <b>143</b>        | <b>14</b>   | <b>9.8</b>           |
| <b>#69</b>         | <b>LIGIV<sup>+/-</sup></b> | <b>20</b>         | <b>0</b>    | <b>0.0</b>           |
| <b>#130-26</b>     | <b>LIGIV<sup>+/-</sup></b> | <b>20</b>         | <b>2</b>    | <b>10.0</b>          |
| <b>#163-7</b>      | <b>LIGIV<sup>+/-</sup></b> | <b>20</b>         | <b>4</b>    | <b>20.0</b>          |
| <b>#312</b>        | <b>LIGIV<sup>-/-</sup></b> | <b>40</b>         | <b>17</b>   | <b>42.5</b>          |

**Supplementary Figure 1. Representative examples of LIGIV-null metaphases containing GCRs**

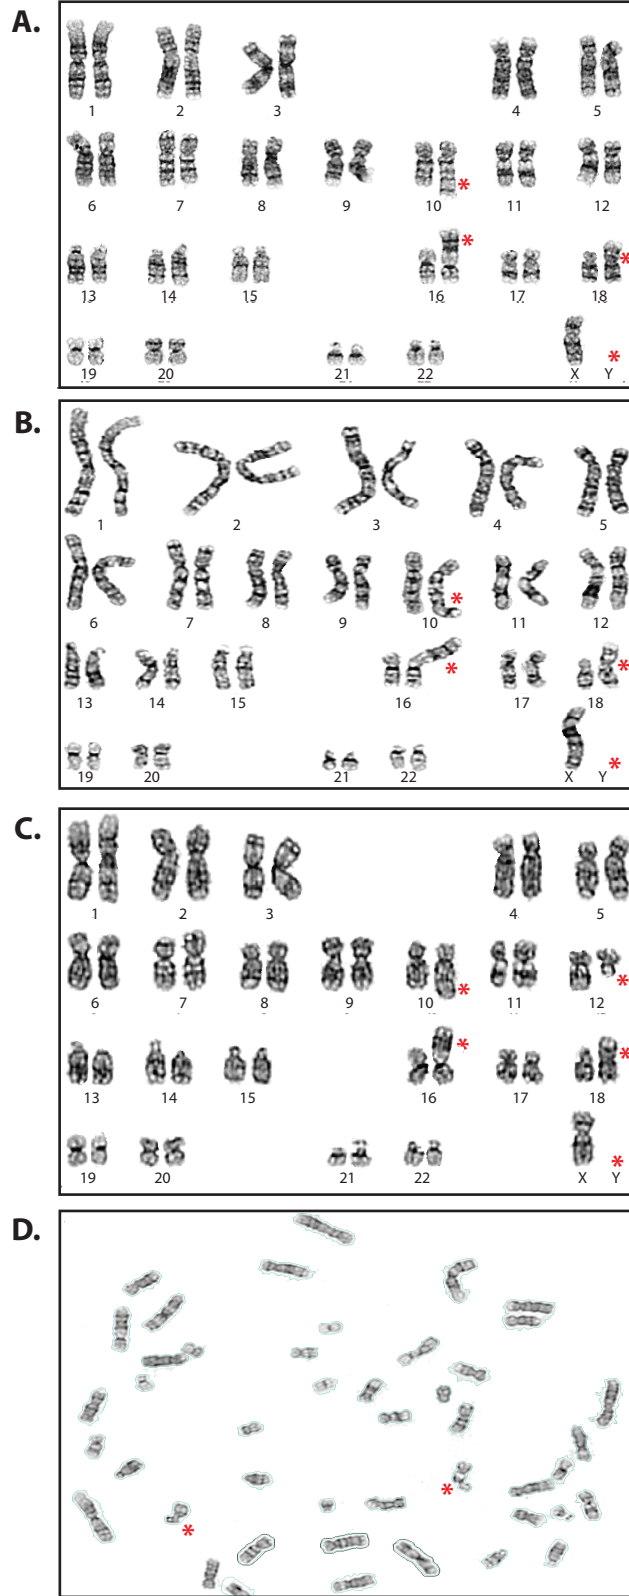

Supplement: supp_gks1326_nar-02656-d-2012-File010.pdf [file supp_gks1326_nar-02656-d-2012-File010.pdf]
